# Supplementary material for: Reevaluating the Stocking Distribution Pattern in Diabetic Peripheral Neuropathy
Source: Research Square preprint supplement (doi:10.21203/rs.3.rs-7946600/v1), 2026-02-23
Supplement: Supplementary file 1 [file 3b841ef0e78055fdc1057e84.docx]

Table 1:

**Continuous Variables Comparison**

| Variable | Stocking Loss Mean (SD) | Any Sensory Loss Mean (SD) | t | df | p-value |
| --- | --- | --- | --- | --- | --- |
| Height (in) | 68.63 (4.35) | 67.04 (4.32) | 5.743 | 1100 | <0.001 |
| HbA1c (%) | 7.85 (2.29) | 7.48 (1.85) | 3.46 | 1081 | <0.001 |
| BMI (kg/m²) | 36.03 (10.39) | 33.97 (8.79) | 3.275 | 1100 | =0.001 |
| Age (years) | 61.23 (12.42) | 63.16 (12.48) | -2.77 | 1100 | =0.006 |
| Duration of Diabetes (years) | 15.13 (10.51) | 14.45 (10.71) | 0.865 | 1100 | =0.387 |

Table 1 caption: This table presents the mean and standard deviation (SD) of continuous clinical and demographic variables among limbs with stocking distribution sensory loss compared to those with any sensory loss. Statistical comparisons were performed using independent samples t-tests. Height (in), Hemoglobin A1c (%), and body mass index (BMI, kg/m²) were all significantly higher in limbs with stocking distribution loss.
