# Supplementary material for: Reevaluating the Stocking Distribution Pattern in Diabetic Peripheral Neuropathy
Source: Research Square preprint supplement (doi:10.21203/rs.3.rs-7946600/v1), 2026-02-23
Supplement: Supplementary file 2 [file afe4cefb117b0be7d8a8aa6c.docx]

Table two:

**Categorical Variables Comparison**

| Variable | Limbs with Stocking Loss (%) | Chi-Square | p-value | Limbs with Any Sensory Loss (%) | Chi-Square | p-value |
| --- | --- | --- | --- | --- | --- | --- |
| Male | 62.7% | 14.31 | <0.001 | 57.9% | 57.25 | <0.001 |
| Female | 37.3% |  |  | 42.1% |  |  |
| Symptomatic | 66.9% | 1.88 | 0.171 | 66.7% | 20.21 | <0.001 |
| Asymptomatic | 33.1% |  |  | 33.3% |  |  |

Table 2 caption: This table displays the distribution of categorical variables—sex and presence of subjective neuropathic symptoms—among limbs exhibiting stocking distribution sensory loss and any sensory loss. Chi-square (Χ²) analyses were performed to evaluate the statistical significance of observed differences. Male sex was significantly associated with both stocking distribution sensory loss (Χ² = 14.31, p < 0.001) and any sensory loss (Χ² = 57.25, p < 0.001). Symptomatic presentation was significantly associated with any sensory loss (Χ² = 20.21, p < 0.001), though the association with stocking distribution alone did not reach statistical significance (Χ² = 1.88, p = 0.171).
